# Supplementary material
Source: HighWire-hosted journal article supplement (https://rapm.bmj.com/highwire/filestream/14956/field_highwire_adjunct_files/9/rapm-2021-102560supp010_data_supplement.pdf)

# Pleural collection

Anechoic collection

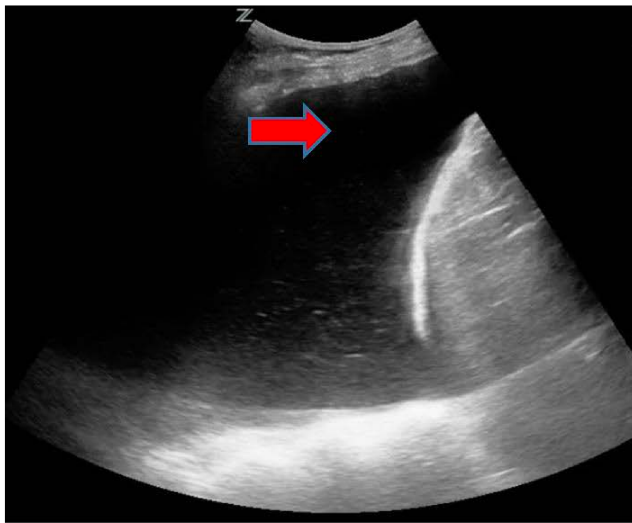

Spine sign

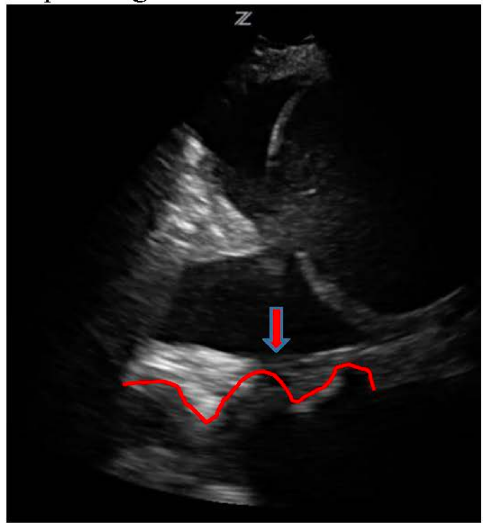

Supplement: rapm-2021-102560supp010_data_supplement.pdf [file rapm-2021-102560supp010_data_supplement.pdf]
